# Supplementary material for: Staying Home, Distancing, and Face Masks: COVID-19 Prevention among U.S. Women in The COPE Study
Source: PubMed Central journal article supplement (PMC7795406; doi:10.3390/ijerph18010180), 2020-12-29
Supplement: ijerph-18-00180-s001.pdf [file ijerph-18-00180-s001.pdf]

Supplementary Table 1. Binary Logistic Regressions for Outcome 1, Staying Home

|                                            |                                                             | Model 1<br>N = 407                               |       | Model 2 *<br>N = 413 |       | Model 3 **<br>N = 421 |       |       |
|--------------------------------------------|-------------------------------------------------------------|--------------------------------------------------|-------|----------------------|-------|-----------------------|-------|-------|
|                                            |                                                             | Exp (B)                                          | p     | Exp (B)              | p     | Exp (B)               | p     |       |
| Personal                                   | Race/Ethnicity<br>(Reference: White)                        | AI/AN                                            | 0.455 | 0.316                | 0.409 | 0.239                 | 0.553 | 0.414 |
|                                            |                                                             | API                                              | 0.636 | 0.474                | 0.588 | 0.365                 | 0.753 | 0.606 |
|                                            |                                                             | Black                                            | 0.622 | 0.427                | 0.664 | 0.467                 | 0.872 | 0.804 |
|                                            |                                                             | Latinx                                           | 0.356 | 0.068                | 0.220 | 0.003                 | 0.287 | 0.011 |
|                                            |                                                             | Other/Multiple                                   | 0.318 | 0.118                | 0.323 | 0.112                 | 0.424 | 0.194 |
|                                            | Education<br>(Reference: High School Diploma, GED, or less) | Some trade or vocational school, or some college | 1.684 | 0.421                |       |                       |       |       |
|                                            |                                                             | Completed trade or vocational school or college  | 1.796 | 0.238                |       |                       |       |       |
|                                            |                                                             | Some or completed graduate school                | 2.061 | 0.195                |       |                       |       |       |
|                                            | Unemployment<br>(Reference: Employed)                       | Since March 1, 2020                              | 1.817 | 0.410                |       |                       |       |       |
|                                            |                                                             | Unemployed Prior to March 1, 2020                | 1.369 | 0.539                |       |                       |       |       |
| Age (Years)                                |                                                             | 0.980                                            | 0.238 | 0.971                | 0.073 |                       |       |       |
| Has had COVID symptoms                     |                                                             | 0.703                                            | 0.518 |                      |       |                       |       |       |
| Know where to get tested for COVID-19      |                                                             | 1.071                                            | 0.858 |                      |       |                       |       |       |
| Has been tested for COVID-19               |                                                             | 2.866                                            | 0.364 |                      |       |                       |       |       |
| Fear of COVID Scale                        |                                                             | 1.075                                            | 0.010 | 1.079                | 0.004 | 1.075                 | 0.005 |       |
| Interpersonal                              | Relationship status<br>(Reference: not partnered)           | Committed, not married                           | 5.498 | 0.034                | 6.819 | 0.015                 | 7.095 | 0.012 |
|                                            | Married                                                     | 0.564                                            | 0.214 | 0.768                | 0.514 | 0.771                 | 0.509 |       |
| Know someone who had COVID-19              |                                                             | 2.306                                            | 0.184 | 2.986                | 0.071 |                       |       |       |
| Organizational                             | Living with others                                          |                                                  | 1.700 | 0.163                |       |                       |       |       |
|                                            | Annual household income (Reference: \$30,000-\$50,000)      | <\$30,000                                        | 3.959 | 0.009                | 4.725 | 0.001                 | 4.317 | 0.001 |
|                                            |                                                             | >\$50,000                                        | 3.117 | 0.014                | 3.473 | 0.004                 | 3.495 | 0.003 |
| No. Children under 18 staying in household |                                                             | 1.482                                            | 0.113 |                      |       |                       |       |       |

|           |                                                 |       |        |       |        |       |        |       |
|-----------|-------------------------------------------------|-------|--------|-------|--------|-------|--------|-------|
| Community | Community environment<br>(Reference: non-urban) | Urban | 0.409  | 0.027 | 0.400  | 0.017 | 0.421  | 0.021 |
|           | Cox & Snell Pseudo-R <sup>2</sup>               |       | 0.124  |       | 0.124  |       | 0.109  |       |
|           | Nagelkerke Pseudo-R <sup>2</sup>                |       | 0.256  |       | 0.252  |       | 0.221  |       |
|           | Model p-value                                   |       | <0.001 |       | <0.001 |       | <0.001 |       |

\* Variables in model are significant at  $p < 0.10$ ; \*\* Variables in model are significant at  $p < 0.05$

Supplementary Table 2. Binary Logistic Regressions for Outcome 2, Physical Distancing 6 Feet While in Public

|               |                                                             | Model 1                                          |       | Model 2 * |       | Model 3 ** |       |       |
|---------------|-------------------------------------------------------------|--------------------------------------------------|-------|-----------|-------|------------|-------|-------|
|               |                                                             | N = 407                                          |       | N = 413   |       | N = 450    |       |       |
|               |                                                             | Exp (B)                                          | $p$   | Exp (B)   | $p$   | Exp (B)    | $p$   |       |
| Personal      | Race/Ethnicity<br>(Reference: White)                        | AI/AN                                            | 0.735 | 0.625     | 0.655 | 0.470      | 0.585 | 0.339 |
|               |                                                             | API                                              | 4.487 | 0.029     | 4.323 | 0.027      | 3.632 | 0.047 |
|               |                                                             | Black                                            | 1.431 | 0.505     | 1.762 | 0.262      | 1.546 | 0.378 |
|               |                                                             | Latinx                                           | 0.633 | 0.379     | 0.556 | 0.201      | 0.470 | 0.092 |
|               |                                                             | Other                                            | 1.450 | 0.577     | 1.265 | 0.703      | 1.152 | 0.815 |
| Personal      | Education<br>(Reference: High School Diploma, GED, or less) | Some trade or vocational school, or some college | 4.109 | 0.053     | 3.983 | 0.028      | 4.044 | 0.025 |
|               |                                                             | Completed trade or vocational school or college  | 0.655 | 0.340     | 0.753 | 0.474      | 0.767 | 0.497 |
|               |                                                             | Some or completed graduate school                | 3.002 | 0.059     | 2.731 | 0.051      | 2.626 | 0.058 |
|               |                                                             | Have a chronic disease                           | 3.265 | 0.020     | 3.103 | 0.012      | 3.334 | 0.008 |
| Personal      | Know where to get tested for COVID-19                       | 1.308                                            | 0.446 |           |       |            |       |       |
|               | Diagnosed with COVID-19                                     | 0.050                                            | 0.002 | 0.068     | 0.004 | 0.052      | 0.002 |       |
|               | Fear of COVID Scale                                         | 1.034                                            | 0.171 |           |       |            |       |       |
| Interpersonal | Relationship status<br>(Reference: not partnered)           | Committed, not married                           | 2.082 | 0.126     | 2.001 | 0.096      | 1.924 | 0.114 |
|               |                                                             | Married                                          | 1.952 | 0.127     | 2.285 | 0.036      | 2.662 | 0.011 |
| Organ         | Know someone who has had COVID-19                           | 2.013                                            | 0.202 |           |       |            |       |       |
|               | No. children under 18 staying in household                  | 1.273                                            | 0.201 |           |       |            |       |       |
| Organ         | <\$30,000                                                   | 1.943                                            | 0.141 |           |       |            |       |       |

|           |                                                        |           |        |       |        |        |
|-----------|--------------------------------------------------------|-----------|--------|-------|--------|--------|
|           | Annual household income (Reference: \$30,000-\$50,000) | >\$50,000 | 1.723  | 0.190 |        |        |
| Community | Community environment (Reference: non-urban)           | Urban     | 0.512  | 0.065 | 0.522  | 0.054  |
|           | Cox & Snell Pseudo-R <sup>2</sup>                      |           | 0.136  |       | 0.104  | 0.093  |
|           | Nagelkerke Pseudo-R <sup>2</sup>                       |           | 0.254  |       | 0.196  | 0.177  |
|           | Model p-value                                          |           | <0.001 |       | <0.001 | <0.001 |

\* Variables in model are significant at  $p < 0.10$ ; \*\* Variables in model are significant at  $p < 0.05$

Supplementary Table 3: Binary Logistic Regressions for Outcome 3, Wearing a Face Mask in Public

|          |                                                          | Model 1                                          |                        | Model 2 * |       | Model 3 ** |       |       |
|----------|----------------------------------------------------------|--------------------------------------------------|------------------------|-----------|-------|------------|-------|-------|
|          |                                                          | N = 421                                          |                        | N = 439   |       | N = 439    |       |       |
|          |                                                          | Exp (B)                                          | p                      | Exp (B)   | p     | Exp (B)    | p     |       |
| Personal | Education (Reference: High School Diploma, GED, or less) | Some trade or vocational school, or some college | 3.833                  | 0.005     | 3.455 | 0.007      | 3.562 | 0.005 |
|          |                                                          | Completed trade or vocational school or college  | 1.766                  | 0.115     | 1.598 | 0.157      | 1.573 | 0.161 |
|          |                                                          | Some or completed graduate school                | 5.038                  | 0.001     | 4.435 | 0.001      | 4.454 | 0.001 |
|          | Unemployment (Reference: Employed)                       | Since March 1, 2020                              | 1.106                  | 0.819     |       |            |       |       |
|          |                                                          | Unemployed Prior to March 1, 2020                | 0.657                  | 0.232     |       |            |       |       |
|          |                                                          | No. children under 18                            | 0.936                  | 0.636     |       |            |       |       |
|          |                                                          | No. children 18 and Older                        | 1.451                  | 0.088     |       |            |       |       |
|          |                                                          | Have a chronic disease                           | 1.448                  | 0.295     |       |            |       |       |
|          |                                                          | Know where to get tested for COVID-19            | 1.705                  | 0.072     | 1.967 | 0.014      | 2.00  | 0.010 |
|          | Interpersonal                                            | Relationship status (Reference: Not Partnered)   | Committed, not married | 1.750     | 0.139 |            |       |       |
|          |                                                          | Married                                          | 1.339                  | 0.405     |       |            |       |       |
| Organiz  |                                                          | Know someone who had COVID-19                    | 0.996                  | 0.993     |       |            |       |       |
|          |                                                          | No. children 18 and older staying in household   | 0.877                  | 0.693     |       |            |       |       |

|           |                                                       |           |        |       |        |       |        |       |
|-----------|-------------------------------------------------------|-----------|--------|-------|--------|-------|--------|-------|
|           | Annual household income Reference: \$30,000-\$50,000) | <\$30,000 | 2.745  | 0.009 | 2.284  | 0.016 | 2.156  | 0.022 |
|           |                                                       | >\$50,000 | 2.479  | 0.010 | 2.25   | 0.013 | 2.184  | 0.013 |
| Community | Region (Reference: Northeast)                         | Midwest   | 0.390  | 0.055 | 0.442  | 0.007 |        |       |
|           |                                                       | South     | 1.026  | 0.958 | 1.019  | 0.968 |        |       |
|           |                                                       | West      | 0.710  | 0.466 | 0.646  | 0.321 |        |       |
|           | Community environment (Reference: Non-urban)          | Urban     | 0.408  | 0.003 | 0.433  | 0.003 | 0.41   | 0.002 |
|           | Cox & Snell Pseudo-R <sup>2</sup>                     |           | 0.137  |       | 0.114  |       | 0.102  |       |
|           | Nagelkerke Pseudo-R <sup>2</sup>                      |           | 0.223  |       | 0.184  |       | 0.165  |       |
|           | Model <i>p</i> -value                                 |           | <0.001 |       | <0.001 |       | <0.001 |       |

\* Variables in model are significant at  $p < 0.10$ ; \*\* Variables in model are significant at  $p < 0.05$
